# Supplementary material for: Impact of Obesogenic Environments on Sugar-Sweetened Beverage Consumption among Preschoolers: Findings from a Cross-Sectional Survey in Beijing
Source: MDPI journal article supplement (doi:10.3390/nu14142860), 2022-07-12
Supplement: s1 [file s1]

## Supplementary Materials

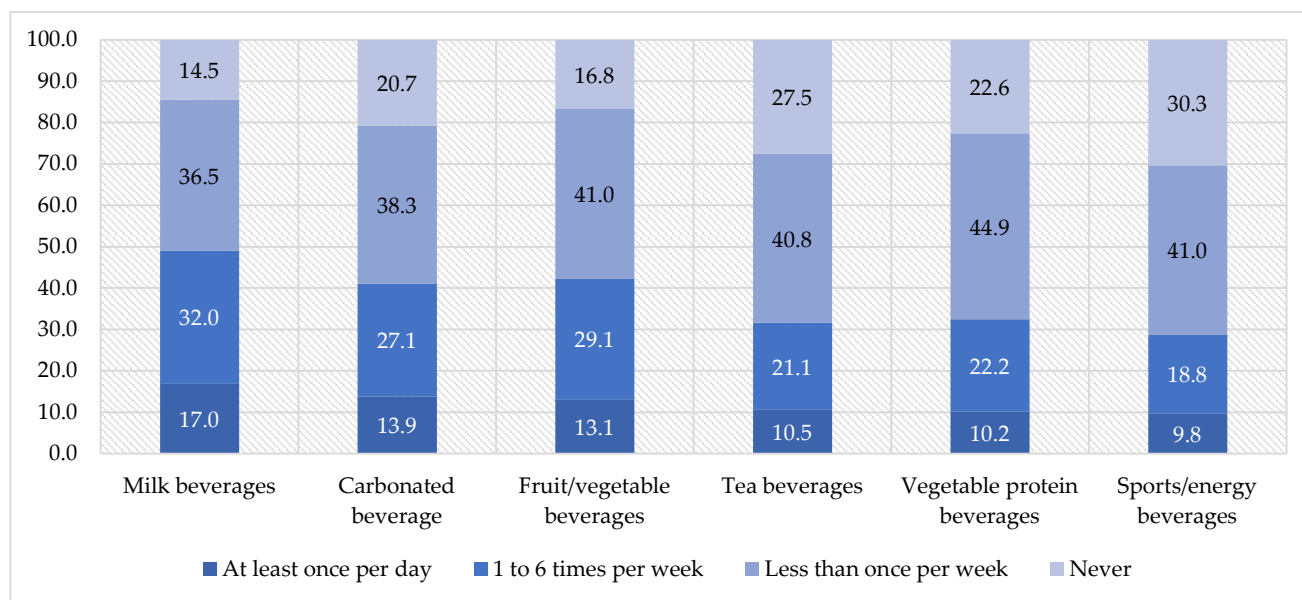

**Figure S1.** Frequencies of exposure to sugar-sweetened beverage advertisement among preschoolers (%).

Notes: Milk beverages (sugar-sweetened milk beverages that were not milk or yogurt, e.g., lactobacillus beverages, Nutri-Express, AD Calcium Milk); fruit/vegetable beverages (vegetable- or fruit-flavored beverages that were not 100 % fruit or vegetable juice, e.g., Orange Multi); vegetable protein beverages (e.g., soya-bean milk drink, walnut drink, syrup of almond); carbonated beverages (e.g., cola, Sprite); tea beverages (e.g., iced tea, jasmine tea); sports/energy beverages (e.g., Vitamin Water, Red Bull, Mizone).

**Table S1.** Associations between milk beverages consumption and exposure to obesogenic environments among preschoolers: Univariate analysis: *n* (%)

| Variables                                                                   | Total       | Milk beverages consumption among preschoolers |            |            |         |
|-----------------------------------------------------------------------------|-------------|-----------------------------------------------|------------|------------|---------|
|                                                                             |             | Yes                                           | No         | $\chi^2/t$ | P value |
| Milk beverage advertisements exposure among preschoolers ( <i>n</i> = 2875) |             |                                               |            | 155.411    | < 0.001 |
| Never                                                                       | 417 (14.5)  | 169 (40.5)                                    | 248 (59.5) |            |         |
| Less than once per week                                                     | 1048 (36.5) | 632 (60.3)                                    | 416 (39.7) |            |         |
| 1 to 6 times per week                                                       | 921 (32.0)  | 654 (71.0)                                    | 267 (29.0) |            |         |
| At least once per day                                                       | 489 (17.0)  | 372 (76.1)                                    | 117 (23.9) |            |         |
| Caregivers took children to fast-food restaurants                           |             |                                               |            | 60.099     | < 0.001 |
| Less than once per week                                                     | 2394 (78.3) | 1427 (59.6)                                   | 967 (40.4) |            |         |
| At least once per week                                                      | 663 (21.7)  | 504 (76.0)                                    | 159 (24.0) |            |         |
| Caregivers read the Nutrition Facts Panel                                   |             |                                               |            | 62.176     | < 0.001 |
| Infrequently                                                                | 1903 (62.3) | 1304 (68.5)                                   | 599 (31.5) |            |         |
| Frequently                                                                  | 1154 (37.7) | 627 (54.3)                                    | 527 (45.7) |            |         |
| Caregivers consumed sugar-sweetened beverage                                |             |                                               |            | 121.888    | < 0.001 |
| Less than once per week                                                     | 1439 (47.1) | 762 (53.0)                                    | 677 (47.0) |            |         |
| At least once per week                                                      | 1618 (52.9) | 1169 (72.2)                                   | 449 (27.8) |            |         |

**Table S2.** Associations between fruit/vegetable beverages consumption and exposure to obesogenic environments among preschoolers: Univariate analysis: *n* (%)

| Variables                                                                                  | Total       | Fruit/vegetable beverages consumption among preschoolers |             |            |         |
|--------------------------------------------------------------------------------------------|-------------|----------------------------------------------------------|-------------|------------|---------|
|                                                                                            |             | Yes                                                      | No          | $\chi^2/t$ | P value |
| <b>Fruit/vegetable beverage advertisements exposure among preschoolers (<i>n</i>=2901)</b> |             |                                                          |             | 244.430    | <0.001  |
| Never                                                                                      | 486 (16.8)  | 339 (69.8)                                               | 147 (30.2)  |            |         |
| Less than once per week                                                                    | 1190 (41.0) | 428 (36.0)                                               | 762 (64.0)  |            |         |
| 1 to 6 times per week                                                                      | 844 (29.1)  | 244 (28.9)                                               | 600 (71.1)  |            |         |
| At least once per day                                                                      | 381 (13.1)  | 118 (31.0)                                               | 263 (69.0)  |            |         |
| <b>Caregivers took children to fast-food restaurants</b>                                   |             |                                                          |             | 47.441     | <0.001  |
| Less than once per week                                                                    | 2394 (78.3) | 1014 (42.4)                                              | 1380 (57.6) |            |         |
| At least once per week                                                                     | 663 (21.7)  | 183 (27.6)                                               | 480 (72.4)  |            |         |
| <b>Caregivers read the Nutrition Facts Panel</b>                                           |             |                                                          |             | 33.873     | <0.001  |
| Infrequently                                                                               | 1903 (62.3) | 669 (35.2)                                               | 1234 (64.8) |            |         |
| Frequently                                                                                 | 1154 (37.7) | 528 (45.8)                                               | 626 (54.2)  |            |         |
| <b>Caregivers consumed sugar-sweetened beverage</b>                                        |             |                                                          |             | 68.571     | <0.001  |
| Less than once per week                                                                    | 1439 (47.1) | 675 (46.9)                                               | 764 (53.1)  |            |         |
| At least once per week                                                                     | 1618 (52.9) | 522 (32.3)                                               | 1096 (67.7) |            |         |

**Table S3.** Associations between vegetable protein beverages consumption and exposure to obesogenic environments among preschoolers: Univariate analysis: *n* (%)

| Variables                                                                                      | Total       | Vegetable protein beverages consumption among preschoolers |             |            |         |
|------------------------------------------------------------------------------------------------|-------------|------------------------------------------------------------|-------------|------------|---------|
|                                                                                                |             | Yes                                                        | No          | $\chi^2/t$ | P value |
| <b>Vegetable protein beverage advertisements exposure among preschoolers (<i>n</i> = 2899)</b> |             |                                                            |             | 204.010    | <0.001  |
| Never                                                                                          | 656 (22.6)  | 477 (72.7)                                                 | 179 (27.3)  |            |         |
| Less than once per week                                                                        | 1303 (44.9) | 616 (47.3)                                                 | 687 (52.7)  |            |         |
| 1 to 6 times per week                                                                          | 645 (22.2)  | 230 (35.7)                                                 | 415 (64.3)  |            |         |
| At least once per day                                                                          | 295 (10.2)  | 118 (40.0)                                                 | 177 (60.0)  |            |         |
| <b>Caregivers took children to fast-food restaurants</b>                                       |             |                                                            |             | 29.990     | <0.001  |
| Less than once per week                                                                        | 2394 (78.3) | 1259 (52.6)                                                | 1135 (47.4) |            |         |
| At least once per week                                                                         | 663 (21.7)  | 269 (40.6)                                                 | 394 (59.4)  |            |         |
| <b>Caregivers read the Nutrition Facts Panel</b>                                               |             |                                                            |             | 6.508      | 0.011   |
| Infrequently                                                                                   | 1903 (62.3) | 917 (48.2)                                                 | 986 (51.8)  |            |         |
| Frequently                                                                                     | 1154 (37.7) | 611 (52.9)                                                 | 543 (47.1)  |            |         |
| <b>Caregivers consumed sugar-sweetened beverage</b>                                            |             |                                                            |             | 24.096     | <0.001  |
| Less than once per week                                                                        | 1439 (47.1) | 787 (54.7)                                                 | 652 (45.3)  |            |         |
| At least once per week                                                                         | 1618 (52.9) | 741 (45.8)                                                 | 877 (54.2)  |            |         |

**Table S4.** Associations between carbonated beverages consumption and exposure to obesogenic environments among preschoolers: Univariate analysis: *n* (%)

| Variables                                                                               | Total       | Carbonated beverages consumption among preschoolers |            |            |                |
|-----------------------------------------------------------------------------------------|-------------|-----------------------------------------------------|------------|------------|----------------|
|                                                                                         |             | Yes                                                 | No         | $\chi^2/t$ | <i>P</i> value |
| <b>Carbonated beverage advertisements exposure among preschoolers (<i>n</i> = 2907)</b> |             |                                                     |            | 119.611    | <0.001         |
| Never                                                                                   | 603 (20.7)  | 502 (83.3)                                          | 101 (16.7) |            |                |
| Less than once per week                                                                 | 1112 (38.3) | 711 (63.9)                                          | 401 (36.1) |            |                |
| 1 to 6 times per week                                                                   | 789 (27.1)  | 451 (57.2)                                          | 338 (42.8) |            |                |
| At least once per day                                                                   | 403 (13.9)  | 233 (57.8)                                          | 170 (42.2) |            |                |
| <b>Caregivers took children to fast-food restaurants</b>                                |             |                                                     |            | 63.847     | <0.001         |
| Less than once per week                                                                 | 2394 (78.3) | 1662 (69.4)                                         | 732 (30.6) |            |                |
| At least once per week                                                                  | 663 (21.7)  | 350 (52.8)                                          | 313 (47.2) |            |                |
| <b>Caregivers read the Nutrition Facts Panel</b>                                        |             |                                                     |            | 24.155     | <0.001         |
| Infrequently                                                                            | 1903 (62.3) | 1190 (62.5)                                         | 713 (37.5) |            |                |
| Frequently                                                                              | 1154 (37.7) | 822 (71.2)                                          | 332 (28.8) |            |                |
| <b>Caregivers consumed sugar-sweetened beverage</b>                                     |             |                                                     |            | 78.399     | <0.001         |
| Less than once per week                                                                 | 1439 (47.1) | 1063 (73.9)                                         | 376 (26.1) |            |                |
| At least once per week                                                                  | 1618 (52.9) | 949 (58.7)                                          | 669 (41.3) |            |                |

**Table S5.** Associations between tea beverages consumption and exposure to obesogenic environments among preschoolers: Univariate analysis: *n* (%)

| Variables                                                                        | Total       | Tea beverages consumption among preschoolers |            |            |                |
|----------------------------------------------------------------------------------|-------------|----------------------------------------------|------------|------------|----------------|
|                                                                                  |             | Yes                                          | No         | $\chi^2/t$ | <i>P</i> value |
| <b>Tea beverage advertisements exposure among preschoolers (<i>n</i> = 2893)</b> |             |                                              |            | 185.918    | <0.001         |
| Never                                                                            | 797 (27.5)  | 737 (92.5)                                   | 60 (7.5)   |            |                |
| Less than once per week                                                          | 1181 (40.8) | 849 (71.9)                                   | 332 (28.1) |            |                |
| 1 to 6 times per week                                                            | 610 (21.1)  | 392 (64.3)                                   | 218 (35.7) |            |                |
| At least once per day                                                            | 305 (10.5)  | 204 (66.9)                                   | 101 (33.1) |            |                |
| <b>Caregivers took children to fast-food restaurants</b>                         |             |                                              |            | 67.615     | <0.001         |
| Less than once per week                                                          | 2394 (78.3) | 1894 (79.1)                                  | 500 (20.9) |            |                |
| At least once per week                                                           | 663 (21.7)  | 422 (63.7)                                   | 241 (36.3) |            |                |
| <b>Caregivers read the Nutrition Facts Panel</b>                                 |             |                                              |            | 21.878     | <0.001         |
| Infrequently                                                                     | 1903 (62.3) | 1388 (72.9)                                  | 515 (27.1) |            |                |
| Frequently                                                                       | 1154 (37.7) | 928 (80.4)                                   | 226 (19.6) |            |                |
| <b>Caregivers consumed sugar-sweetened beverage</b>                              |             |                                              |            | 71.220     | <0.001         |
| Less than once per week                                                          | 1439 (47.1) | 1190 (82.7)                                  | 249 (17.3) |            |                |
| At least once per week                                                           | 1618 (52.9) | 1126 (69.6)                                  | 492 (30.4) |            |                |

**Table S6.** Associations between sports/energy beverages consumption and exposure to obesogenic environments among preschoolers: Univariate analysis: *n* (%)

| Variables                                                                                  | Total       | Sports/energy beverages consumption among preschoolers |            |            |                |
|--------------------------------------------------------------------------------------------|-------------|--------------------------------------------------------|------------|------------|----------------|
|                                                                                            |             | Yes                                                    | No         | $\chi^2/t$ | <i>P</i> value |
| <b>Sports/energy beverage advertisements exposure among preschoolers (<i>n</i> = 2897)</b> |             |                                                        |            | 135.587    | <0.001         |
| Never                                                                                      | 879 (30.3)  | 810 (92.2)                                             | 69 (7.8)   |            |                |
| Less than once per week                                                                    | 1188 (41.0) | 889 (74.8)                                             | 299 (25.2) |            |                |
| 1 to 6 times per week                                                                      | 546 (18.8)  | 390 (71.4)                                             | 156 (28.6) |            |                |
| At least once per day                                                                      | 284 (9.8)   | 200 (70.4)                                             | 84 (29.6)  |            |                |
| <b>Caregivers took children to fast-food restaurants</b>                                   |             |                                                        |            | 44.285     | <0.001         |
| Less than once per week                                                                    | 2394 (78.3) | 1953 (81.6)                                            | 441 (18.4) |            |                |
| At least once per week                                                                     | 663 (21.7)  | 462 (69.7)                                             | 201 (30.3) |            |                |
| <b>Caregivers read the Nutrition Facts Panel</b>                                           |             |                                                        |            | 5.393      | 0.020          |
| Infrequently                                                                               | 1903 (62.3) | 1478 (77.7)                                            | 425 (22.3) |            |                |
| Frequently                                                                                 | 1154 (37.7) | 937 (81.2)                                             | 217 (18.8) |            |                |
| <b>Caregivers consumed sugar-sweetened beverage</b>                                        |             |                                                        |            | 35.743     | <0.001         |
| Less than once per week                                                                    | 1439 (47.1) | 1204 (83.7)                                            | 235 (16.3) |            |                |
| At least once per week                                                                     | 1618 (52.9) | 1211 (74.8)                                            | 407 (25.2) |            |                |
